# Supplementary material
Source: PubMed Central journal article supplement (PMC3084977)
Supplement: cam0502_0119SD1.pdf [file cam0502_0119SD1.pdf]

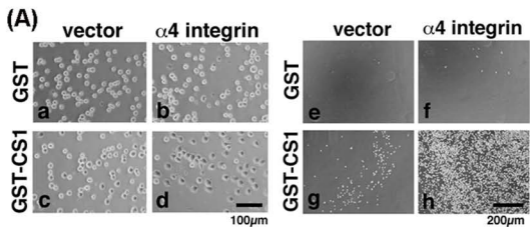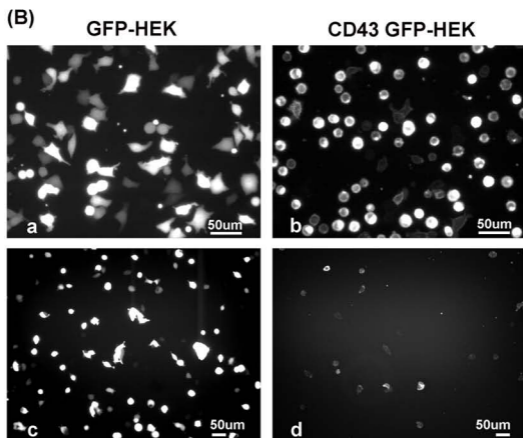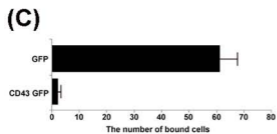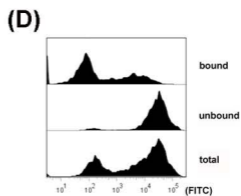

Supplementary File.

**Inhibition of cell adhesion by CD43.** (A) CS1-dependent spreading/binding of  $\alpha 4$ -HEK293T cells. HEK293T stable transfectants of empty vector (Vector-HEK293T) and  $\alpha 4$ -integrin expression vector ( $\alpha 4$ -HEK293T) were plated on the plates coated with GST or GST-CS1. Images of cell spreading (a~d) or adhesion after wash (e~h) were presented. (B) Effect of CD43 on integrin-mediated spreading and binding. Spreading (a, b) and binding after wash (c, d) on the GST-CS1-coated wells of  $\alpha 4$ -HEK293T cells transfected with the expression vector of GFP (a, c) or CD43-GFP (b, d) were visualized by fluorescent microscopy. (C) The numbers of bound cells. Each histogram indicates the number of fluorescent  $\alpha 4$ -HEK293T cells adhered to GST-CS1-coated wells from three experiments. (D) FCM analysis of the expression of CD43-GFP. Fluorescent intensity of CD43-GFP in the total cells (bottom), cells bound (top) or unbound (middle) to the GST-CS1-coated well was demonstrated.
